# Supplementary material for: Facile covalent functionalization of boron nitride nanotubes via coupling reaction
Source: Royal Society of Chemistry journal article supplement (doi:10.1039/d4na00458b), 2024-01-01
Supplement: d4na00458b1.pdf [file d4na00458b1.pdf]

## Supporting Information

# Facile Covalent Functionalization of Boron Nitride Nanotubes via Coupling Reaction

*Thang Quoc Huynh<sup>1,2</sup>, Minsung Kang<sup>1</sup>, Jeung Gon Kim<sup>2,3\*</sup>, Seokhoon Ahn<sup>1,3\*</sup>*

<sup>1</sup> Institute of Advanced Composite Materials, Korea Institute of Science and Technology (KIST), Chudong-ro 92, Bongdong-eup, Wanju-gun 55324, Jeonbuk, Korea

<sup>2</sup> Department of Chemistry and Research Institute of Physics and Chemistry, Jeonbuk National University, Jeonbuk 54896, Republic of Korea

<sup>3</sup> Department of JBNU-KIST Industry-Academia Convergence Research, Jeonbuk National University, Jeonbuk 54896, Republic of Korea

\* indicates the corresponding author.

\* Corresponding author: Seokhoon Ahn, Jeung Gon Kim

E-mail address: [ahn75@kist.re.kr](mailto:ahn75@kist.re.kr); [jeunggonkim@jbnu.ac.kr](mailto:jeunggonkim@jbnu.ac.kr)

**Supporting Table 1.** Reaction optimization

| Sample   | Factors change<br>from standard<br>condition a | Atomic % <sup>b</sup> |              |              |             |
|----------|------------------------------------------------|-----------------------|--------------|--------------|-------------|
|          |                                                | B                     | C            | N            | O           |
| BNNTs    |                                                | 52.53                 | 4.17         | 40.73        | 2.57        |
| 1        | H <sub>2</sub> O/EtOH                          | 50.42                 | 7.21         | 39.20        | 3.35        |
| 2        | H <sub>2</sub> O                               | 49.34                 | 7.70         | 39.22        | 3.75        |
| 3        | EtOH                                           | 47.32                 | 10.51        | 37.80        | 4.37        |
| 4        | Acetone                                        | 49.50                 | 7.41         | 39.54        | 3.55        |
| <b>5</b> | <b>CHCl<sub>3</sub></b>                        | <b>36.01</b>          | <b>20.69</b> | <b>28.22</b> | <b>6.91</b> |
| 6        | 200 mg salt                                    | 47.05                 | 10.24        | 38.48        | 4.23        |
| 7        | 3 days                                         | 47.17                 | 11.13        | 37.00        | 4.70        |
| 8        | 100°C                                          | 48.00                 | 9.51         | 37.22        | 5.27        |

<sup>a</sup>: Reaction Conditions: 100 mg salt, 10 mg BNNTs, and 10 ml solvent, 18h, 55°C. <sup>b</sup>: Determined using XPS analysis.

Samples 1-5 were prepared using standard reaction conditions <sup>a</sup>. Samples 6-8 were prepared using standard reaction conditions <sup>a</sup>, with chloroform (CHCl<sub>3</sub>) as the solvent and modified specific factor, as indicated in the table. 5 is an optimized sample (highlighted).

**Supporting Table 2.** Important IR peak

| Sample      | Important peak                    |
|-------------|-----------------------------------|
| <b>BNNT</b> | 1374, 811, 795                    |
| <b>3a</b>   | 2920, 2848, 1373, 795             |
| <b>3b</b>   | 2924, 2847, 1378, 803             |
| <b>3c</b>   | 2925, 2845, 1377, 801             |
| <b>3d</b>   | 2925, 2852, 1740, 1374, 798       |
| <b>3e</b>   | 2925, 2883, 2194, 1653, 1379, 809 |
| <b>3f</b>   | 2960, 1507, 1456, 1373, 940, 806  |
| <b>3g</b>   | 2924, 2845, 1377, 800             |

**Supporting Table 3. XPS composition of BNNTs and 3a-3g**

| Sample       | Atomic % <sup>b</sup> |       |       |      |      |      |
|--------------|-----------------------|-------|-------|------|------|------|
|              | B                     | C     | N     | O    | F    | Br   |
| <b>BNNTs</b> | 52.53                 | 4.17  | 40.73 | 2.57 |      |      |
| <b>3a</b>    | 49.17                 | 8.40  | 37.75 | 4.45 |      | 0.22 |
| <b>3b</b>    | 49.03                 | 8.39  | 37.64 | 4.43 | 0.51 |      |
| <b>3c</b>    | 49.81                 | 6.62  | 39.70 | 3.81 |      |      |
| <b>3d</b>    | 45.82                 | 13.71 | 36.46 | 4.01 |      |      |
| <b>3e</b>    | 44.18                 | 15.65 | 35.08 | 5.09 |      |      |
| <b>3f</b>    | 39.34                 | 22.44 | 31.20 | 7.02 |      |      |
| <b>3g</b>    | 35.61                 | 16.41 | 43.27 | 4.71 |      |      |

**Supporting Table 4.** Weight loss (%) of sample 3a – 3g

| Sample    | Weight loss (%) |
|-----------|-----------------|
| <b>3a</b> | 8.1             |
| <b>3b</b> | 8.2             |
| <b>3c</b> | 4.1             |
| <b>3d</b> | 11.8            |
| <b>3e</b> | 11.8            |
| <b>3f</b> | 21.8            |
| <b>3g</b> | 13.9            |

**Supporting Figure 1: SEM of BNNTs, 3a-3g proved the stability of nanotubes after the reaction.**

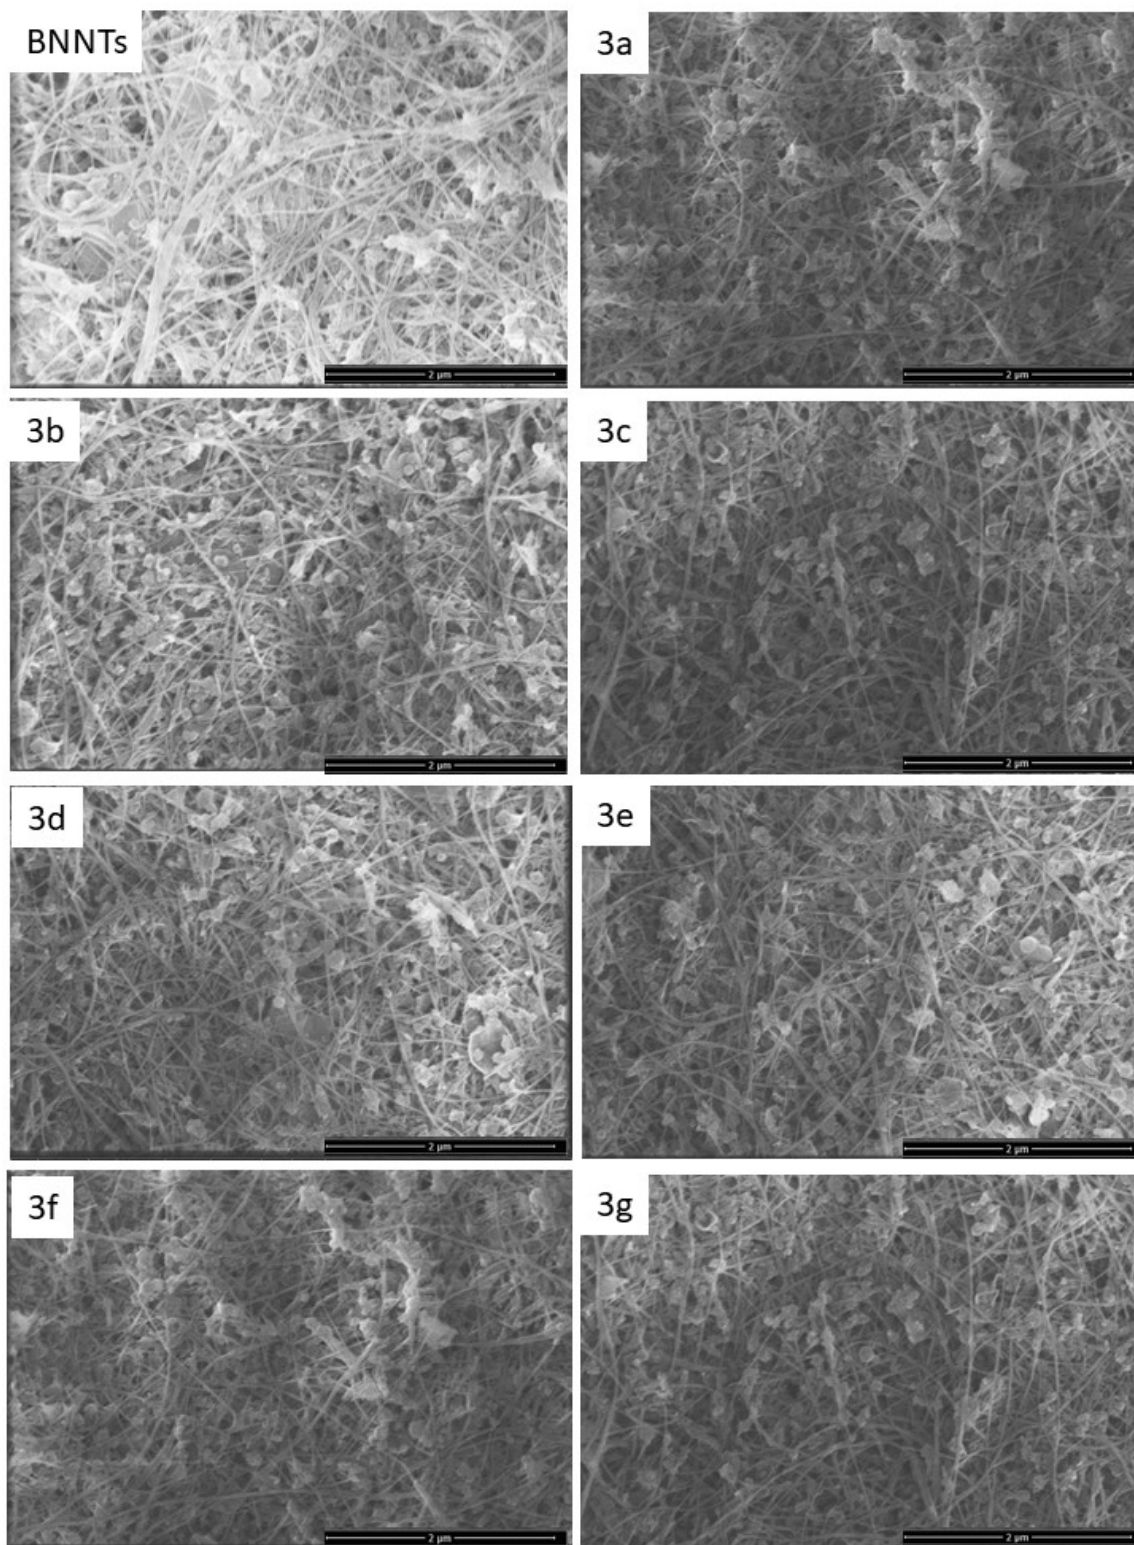

Supporting Figure 2 XPS TGA of sample 3a-3f

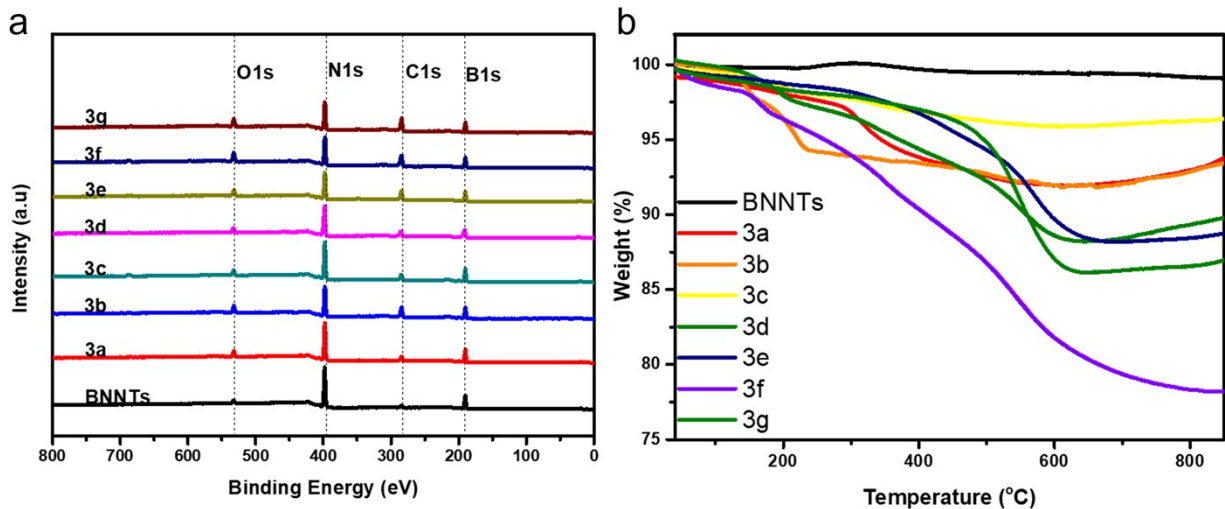

Supporting Figure 3 FTIR and magnified FTIR of sample 3a-3f

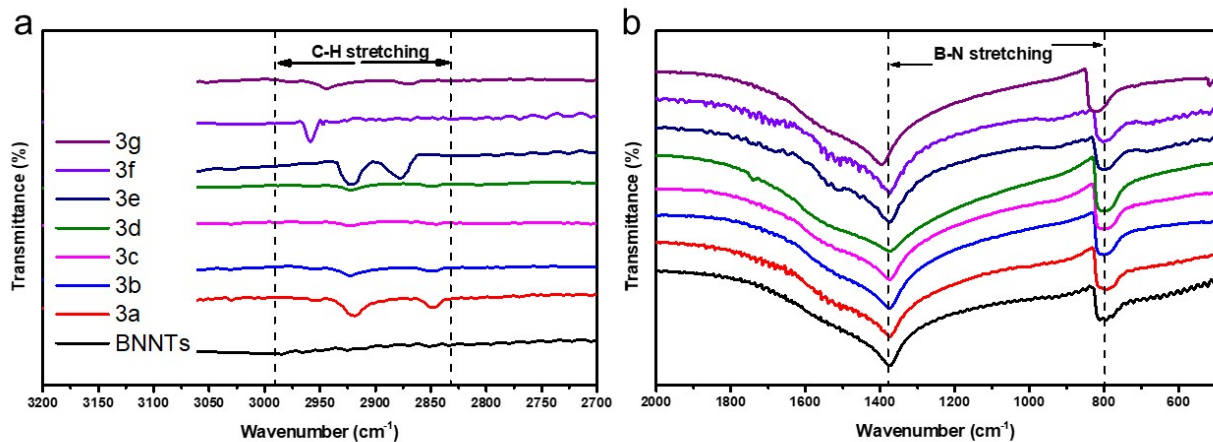

Supporting Figure 4, estimate dispersion by UV spectra of sample 3a-3f, procedure followed by reference<sup>1</sup>

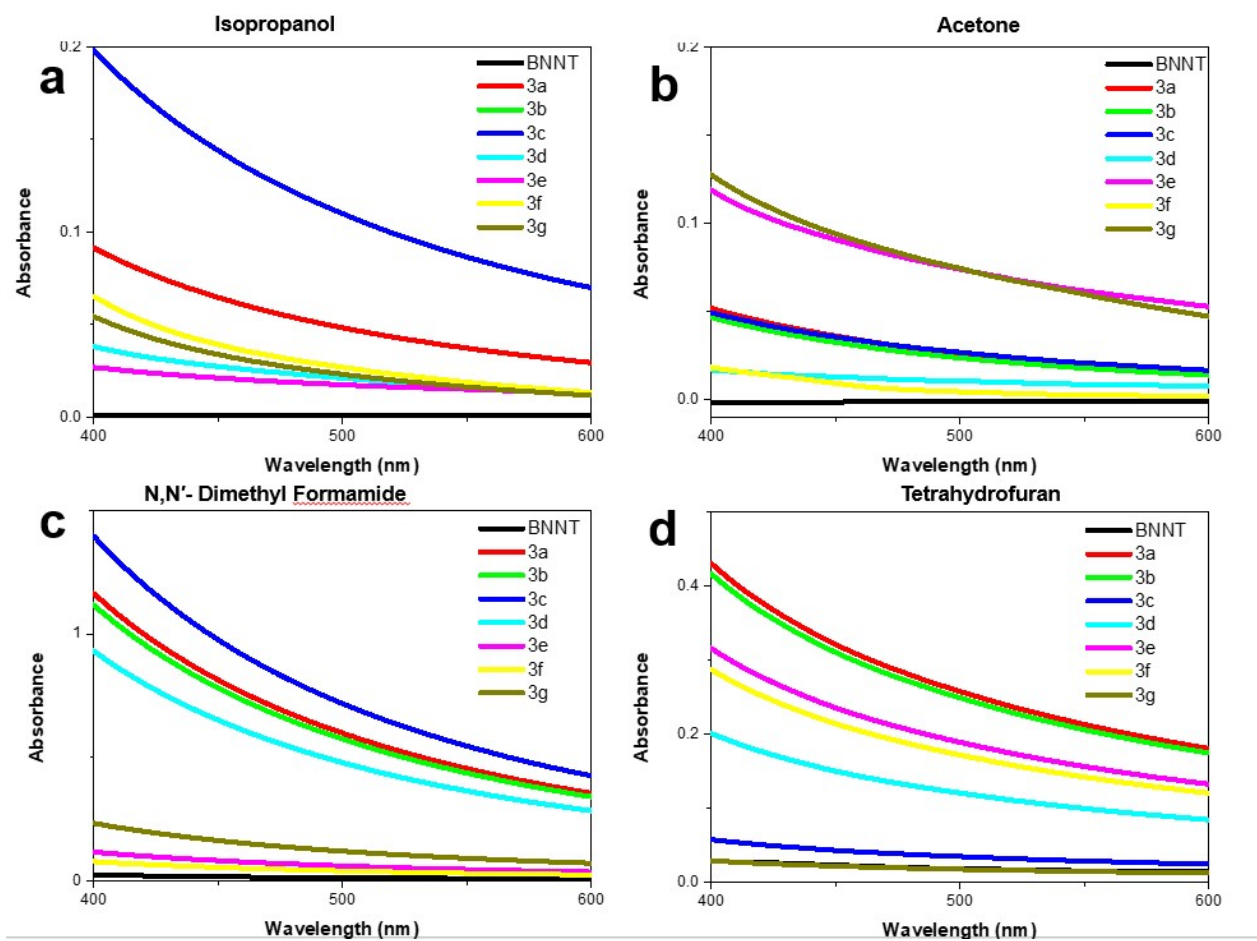



## Reference

- (1) Lee, S.-H.; Kim, M. J.; Ahn, S.; Koh, B. Purification of Boron Nitride Nanotubes Enhances Biological Application Properties. *Int. J. Mol. Sci.* **2020**, *21* (4), 1529. <https://doi.org/10.3390/ijms21041529>.
